# Supplementary material for: Small molecule-assisted synthesis of carbon supported platinum intermetallic fuel cell catalysts
Source: PubMed Central journal article supplement (PMC9622856; doi:10.1038/s41467-022-34037-7), 2022-10-31
Supplement: 41467_2022_34037_MOESM1_ESM.pdf [file 41467_2022_34037_MOESM1_ESM.pdf]

## Supplementary Materials

1  
2  
3  
4  
5  
6  
7  
8  
9  
10  
11  
12  
13  
14  
15  
16

### **Small molecule-assisted synthesis of carbon supported platinum intermetallic fuel cell catalysts**

Tian-Wei Song<sup>1</sup>, Cong Xu<sup>1</sup>, Zhu-Tao Sheng<sup>2</sup>, Hui-Kun Yan<sup>1</sup>, Lei Tong<sup>1</sup>, Jun Liu<sup>3,4</sup>, Wei-Jie Zeng<sup>1</sup>,  
Lu-Jie Zuo<sup>1</sup>, Peng Yin<sup>1</sup>, Ming Zuo<sup>1</sup>, Sheng-Qi Chu<sup>5</sup>, Ping Chen<sup>6</sup>, Hai-Wei Liang<sup>1\*</sup>

<sup>1</sup>Hefei National Research Center for Physical Sciences at the Microscale, Department of Chemistry, University of Science and Technology of China, Hefei 230026, China

<sup>2</sup>College of Chemistry and Materials Science, Anhui Normal University, Wuhu 241000, China

<sup>3</sup>Institute of Solid State Physics, Hefei Institutes of Physical Science, Chinese Academy of Sciences, Hefei 230031, China

<sup>4</sup>Anhui Contango New Energy Technology Co., Ltd, Hefei 230088, China

<sup>5</sup>Institute of High Energy Physics, Chinese Academy of Sciences, Beijing 100049, China

<sup>6</sup>School of Chemistry and Chemical Engineering, Anhui University, Hefei 230601, China

\*email: hwliang@ustc.edu.cn

17 **Chemicals and materials**

18 Vanadium trichloride ( $\text{VCl}_3$ , 97%) and perchloric acid ( $\text{HClO}_4$ , 70%) were purchased from Sigma-  
19 Aldrich. Germanium chloride ( $\text{GeCl}_4$ , 99.9999%) were purchased from Alfa Aesar.  
20 Dicyandiamide (DCDA, 99%) was purchased from J&K Scientific Ltd. Indium chloride ( $\text{InCl}_3$ ,  
21 99.9%), gallium chloride ( $\text{GaCl}_3$ , 99.999%), 2,3-Benzofuran (99%), glucose (98%), 2-  
22 acetylpyrrole (99%), 11-Mercaptoundecanoic acid (95%), and 2-Mercaptobenzimidazole (98%)  
23 were purchased from Shanghai Macklin Biochemical Co., Ltd., China. All other chemicals were  
24 purchased from Sinopharm Chemical Reagent Co. Ltd., China, including hexachloroplatinic  
25 hexahydrate ( $\text{H}_2\text{PtCl}_6 \cdot 6\text{H}_2\text{O}$ , 99%), aluminium chloride ( $\text{AlCl}_3 \cdot 6\text{H}_2\text{O}$ , 97%), titanium  
26 tetrachloride ( $\text{TiCl}_4$ , 98%), chromium chloride hexahydrate ( $\text{CrCl}_3 \cdot 6\text{H}_2\text{O}$ , 99%), manganous  
27 chloride tetrahydrate ( $\text{MnCl}_2 \cdot 4\text{H}_2\text{O}$ , 99%), ferric chloride hexahydrate ( $\text{FeCl}_3$ , 97%), cobalt  
28 chloride hexahydrate ( $\text{CoCl}_2 \cdot 6\text{H}_2\text{O}$ , 99%), nickel chloride hexahydrate ( $\text{NiCl}_2 \cdot 6\text{H}_2\text{O}$ , 98%),  
29 copper nitrate trihydrate ( $\text{Cu}(\text{NO}_3)_2 \cdot 3\text{H}_2\text{O}$ , 99%), zinc nitrate hexahydrate ( $\text{Zn}(\text{NO}_3)_2 \cdot 6\text{H}_2\text{O}$ ,  
30 99%), stannous chloride dihydrate ( $\text{SnCl}_2 \cdot 2\text{H}_2\text{O}$ , 98%), sodium acetate (99.99%), sodium  
31 glycinate (98%), 1-mercaptopropane (99.5%), sodium thioglycolate (97%), and sulfuric acid  
32 ( $\text{H}_2\text{SO}_4$ , 95%~98%). All the chemicals were used as received without further purification.  
33 Deionized water (18.2 M $\Omega$ /cm) used in all experiments was prepared by passing through an ultra-  
34 pure purification system.

35

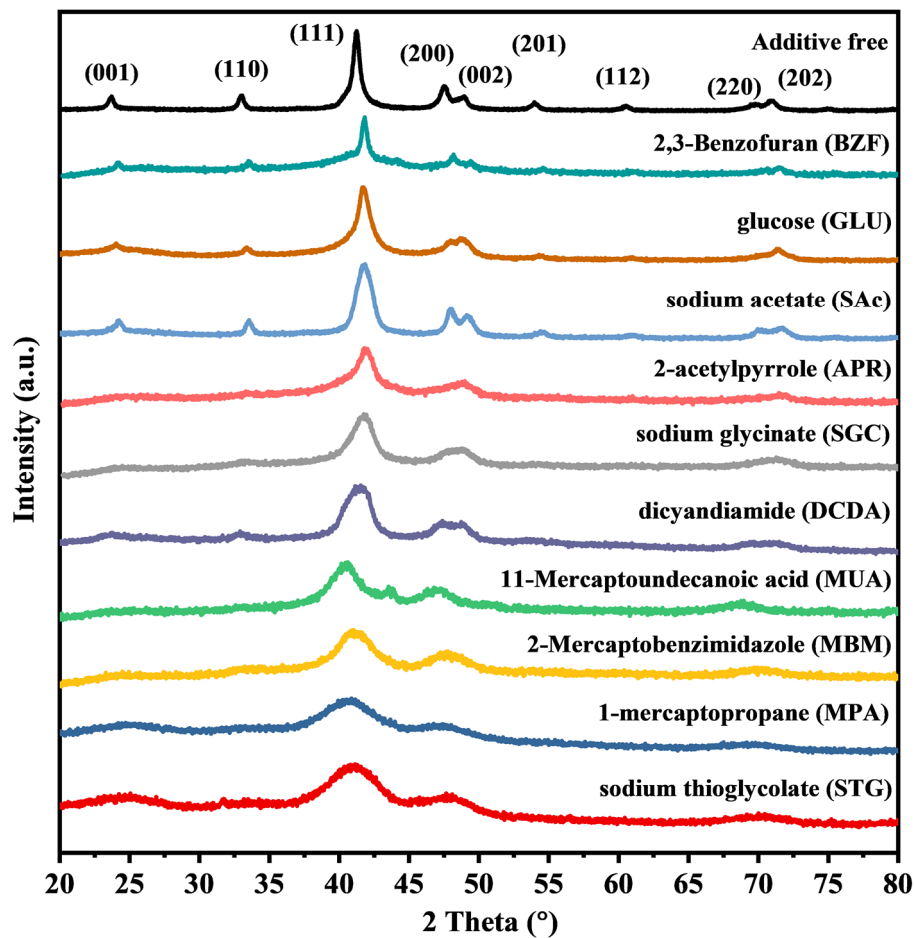

36  
 37 **Supplementary Figure 1.** XRD patterns of the PtCo catalysts prepared with different molecule  
 38 additives. The total metal loading of all the samples were controlled to be 30 wt%.

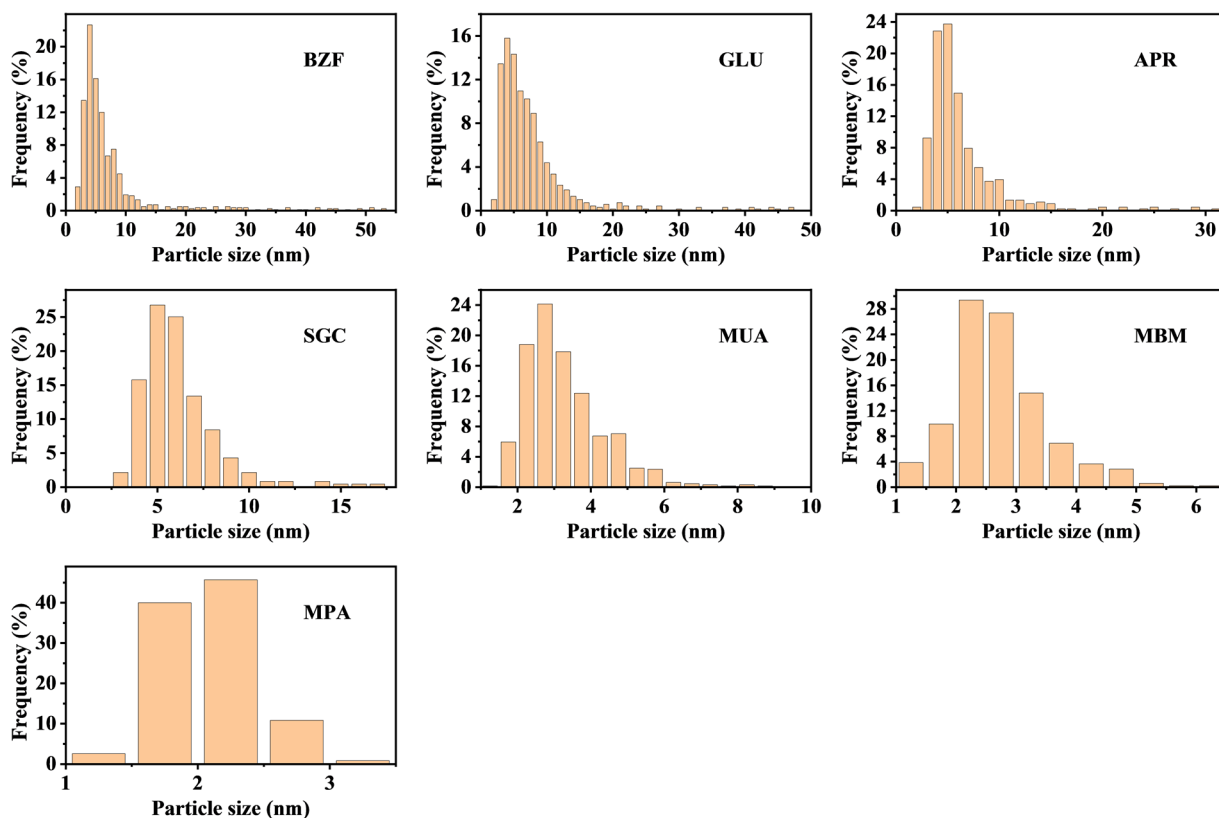

39  
 40 **Supplementary Figure 2.** Particle size distribution histograms of the PtCo catalysts prepared  
 41 with different molecule additives, which were obtained through statistic of more than 500 particles  
 42 in HAADF-STEM images.

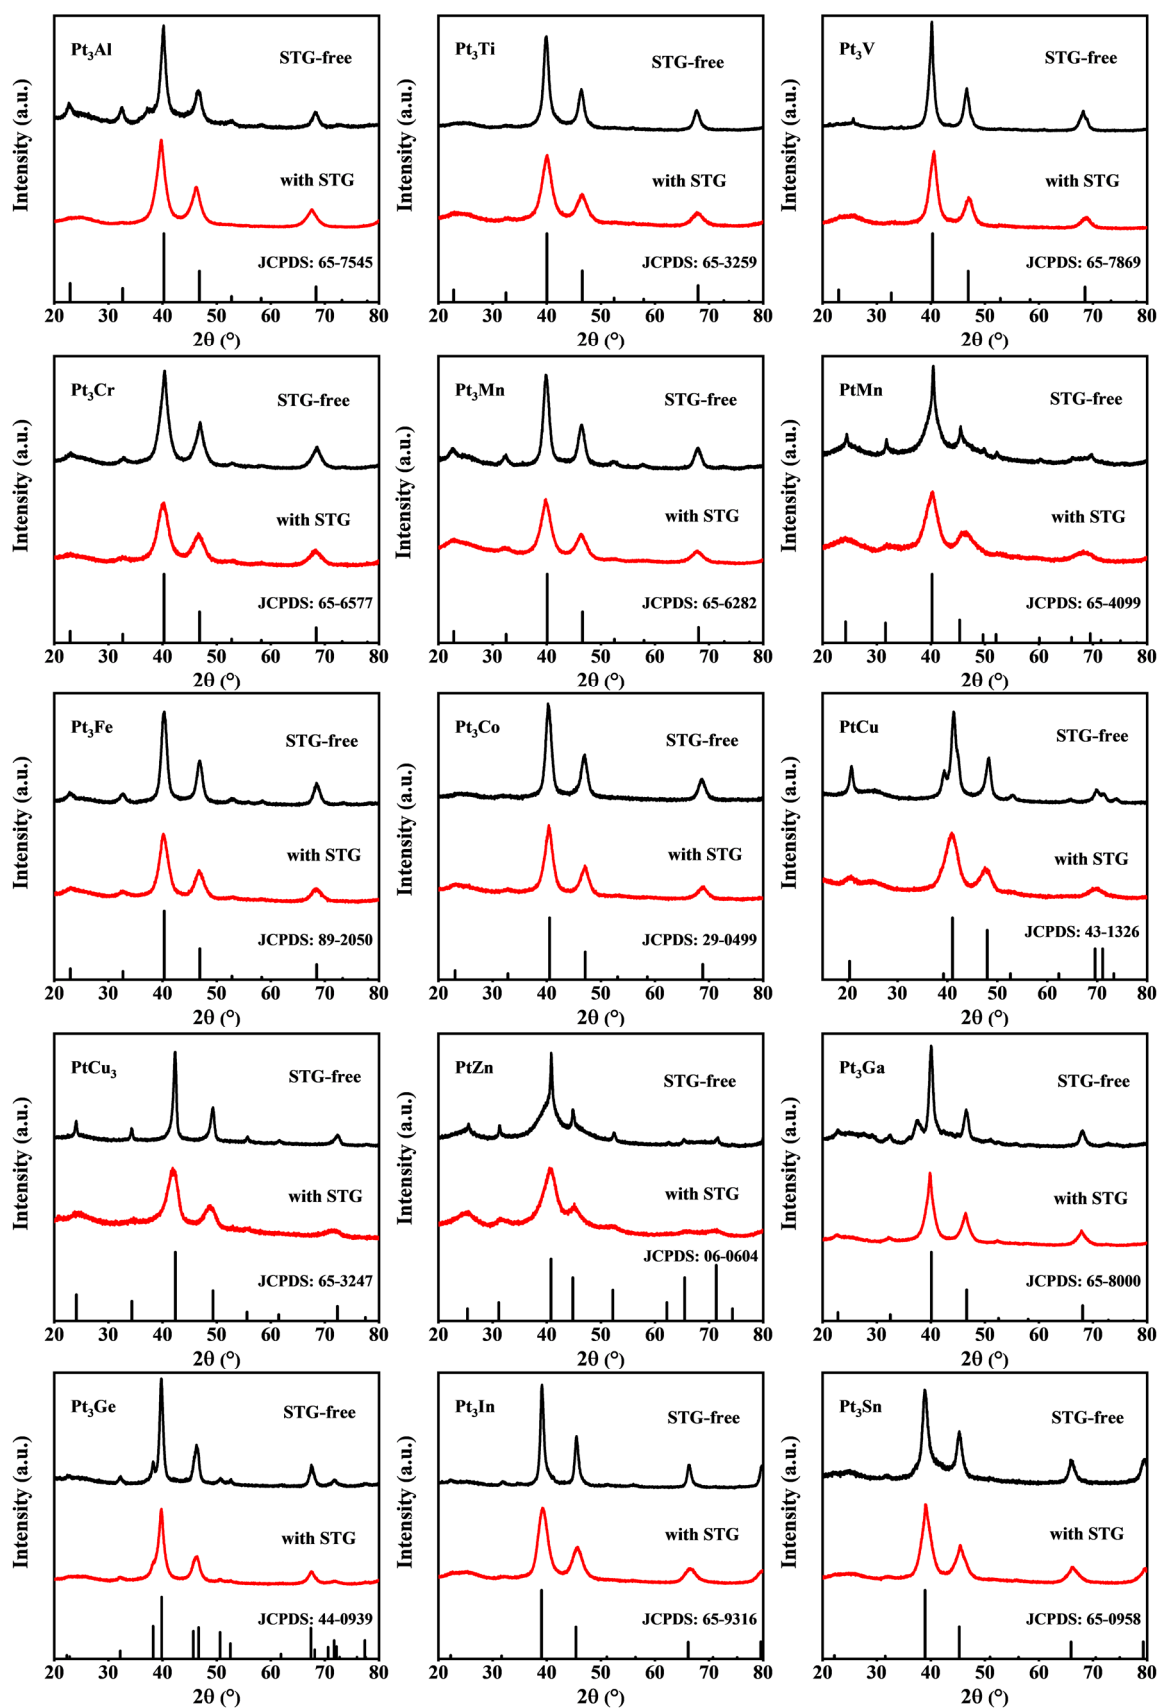

43

44 **Supplementary Figure 3.** XRD patterns of the Pt-IMCs catalysts prepared with and without STG.  
 45 The JCPDS cards of the corresponding IMCs structures were also shown.

46

47

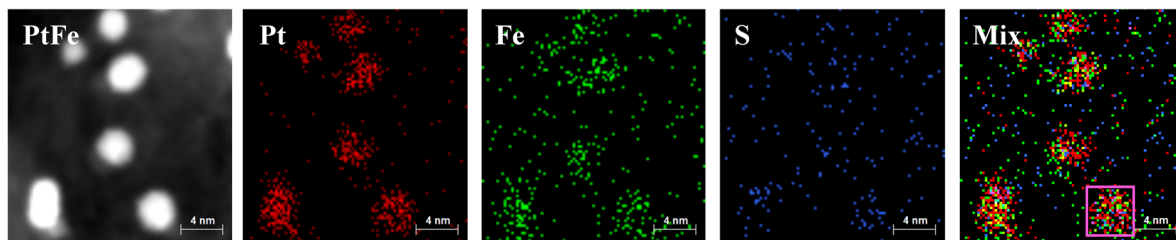

48

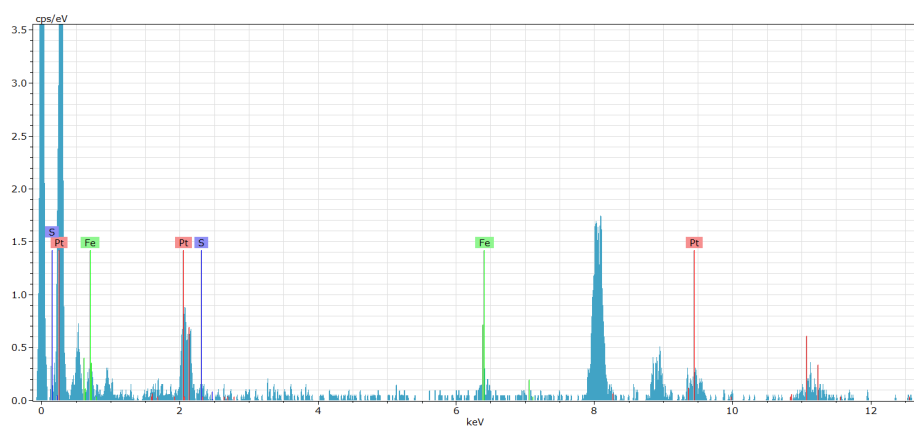

49 **Supplementary Figure 4.** EDS elemental mapping and EDS spectra of the PtFe IMCs catalyst.

50

51

52

53

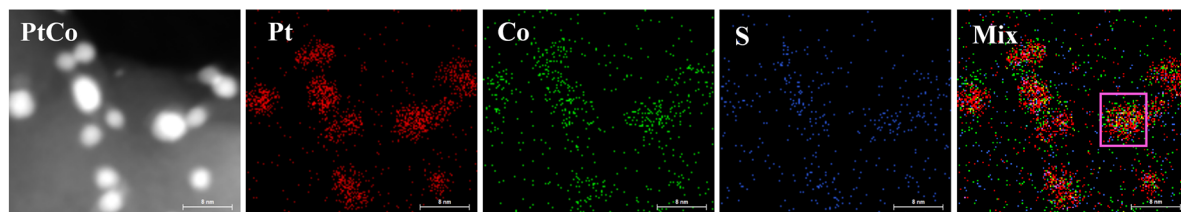

54

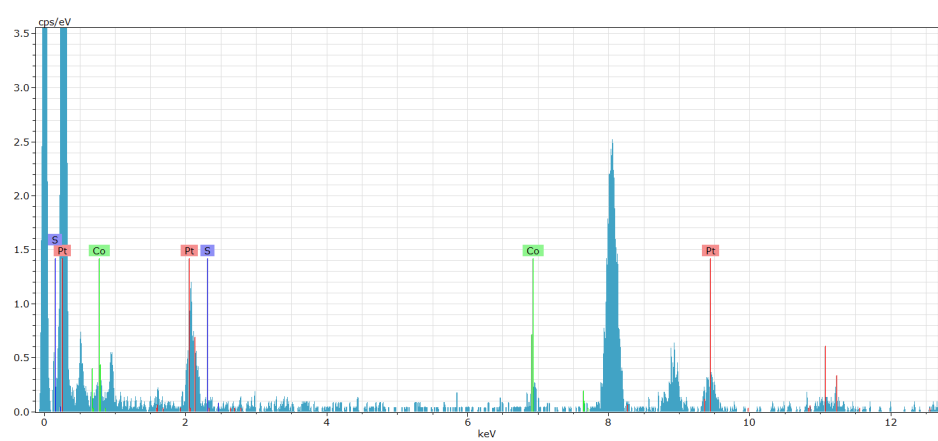

55 **Supplementary Figure 5.** EDS elemental mapping and EDS spectra of the PtCo IMCs catalyst.  
56

57

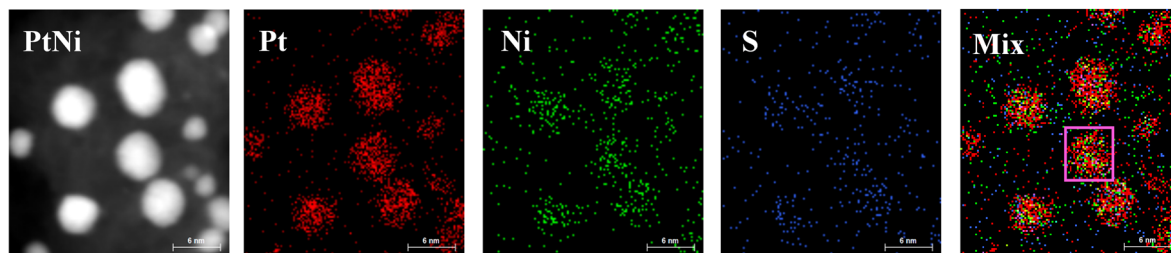

58

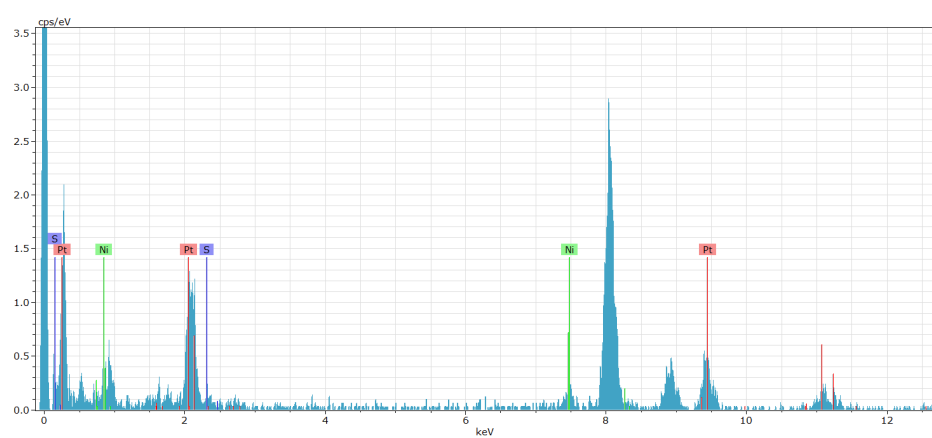

59 **Supplementary Figure 6.** EDS elemental mapping and EDS spectra of the PtNi IMCs catalyst.

60



61

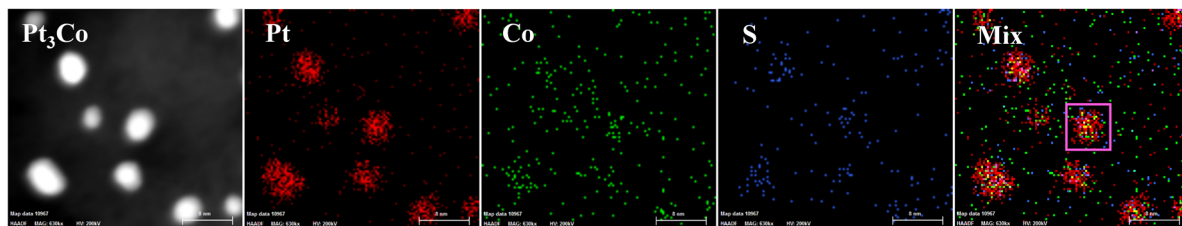

62

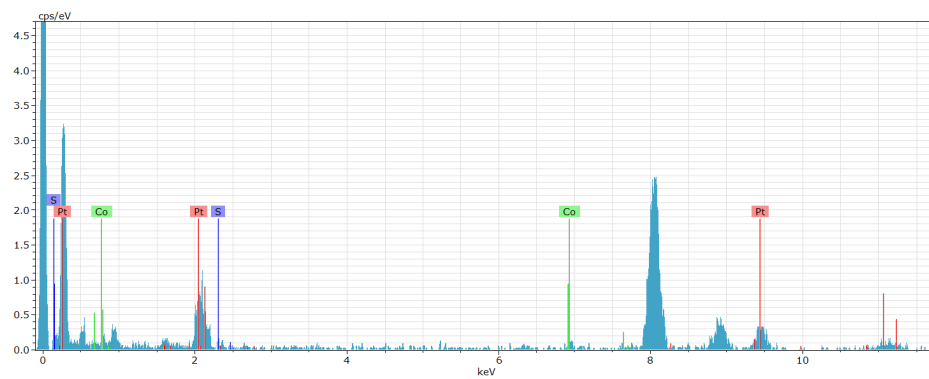

63 **Supplementary Figure 7.** EDS elemental mapping and EDS spectra of the Pt<sub>3</sub>Co IMCs catalyst.

64

65

66

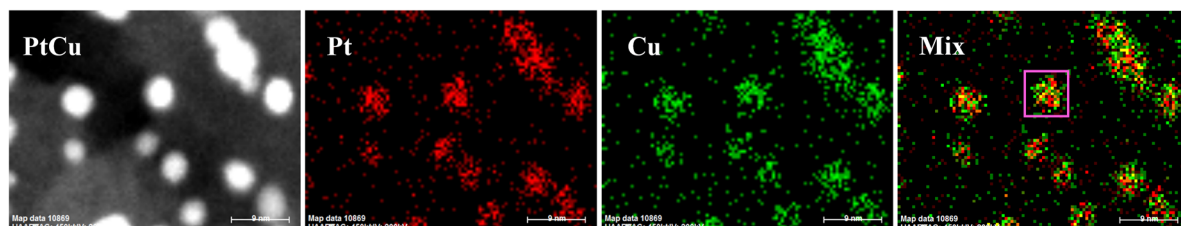

67

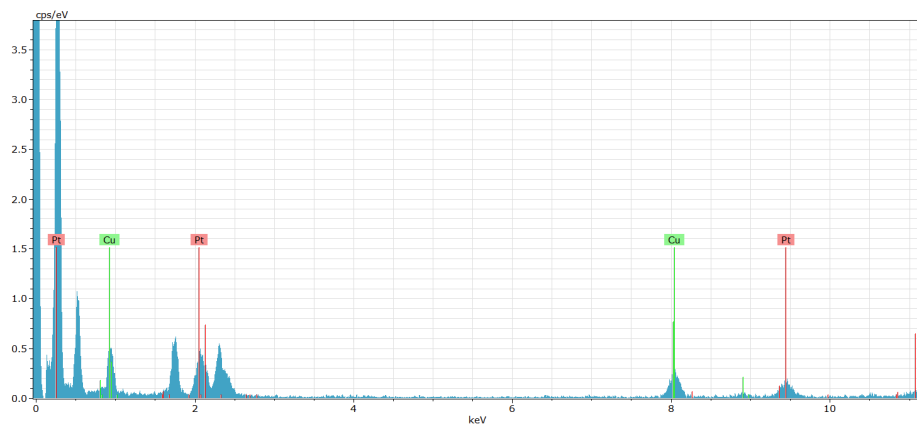

68 **Supplementary Figure 8.** EDS elemental mapping and EDS spectra of the PtCu IMCs catalyst.  
69 Molybdenum microgrid was used instead of cooper microgrid for the EDS measurements.

70

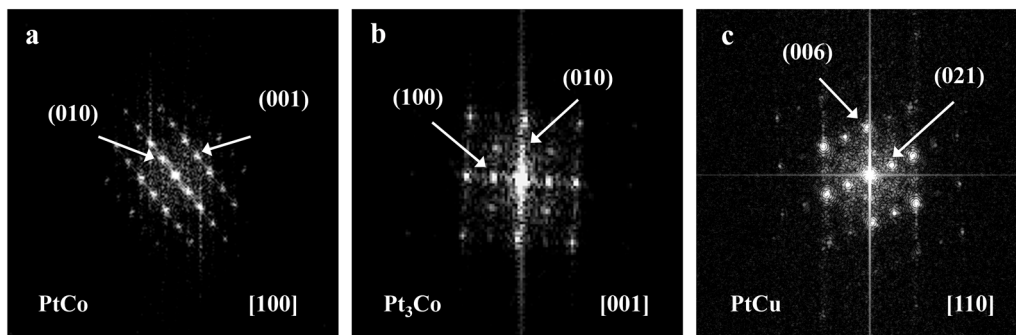

71

72 **Supplementary Figure 9.** FFT patterns of PtCo (a), Pt<sub>3</sub>Co (b), and PtCu (c) catalysts whose  
73 atomic-resolution HAADF-STEM images were shown in Fig 4.

74

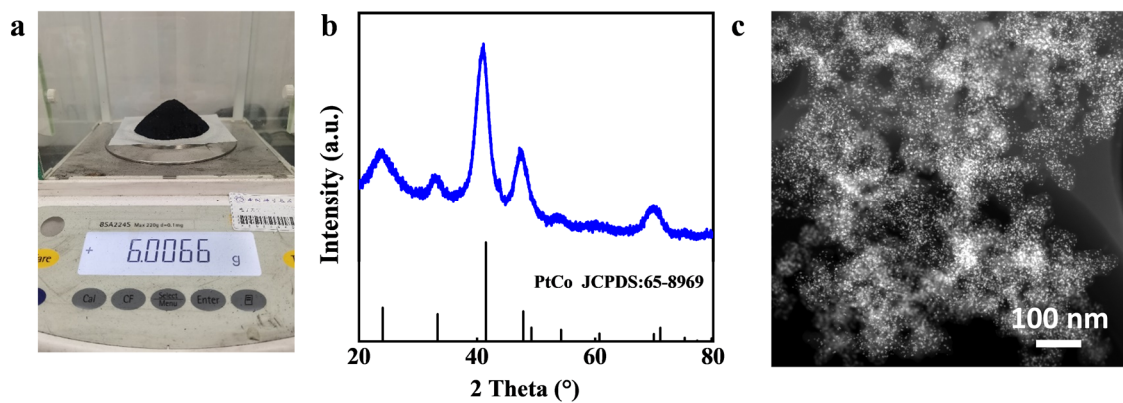

75

76 **Supplementary Figure 10.** (a) Photograph showing the large-scale synthesis of the PtCo IMCs  
77 catalyst with STG as additives, the one-batch production could exceeded 6 grams. (b) XRD  
78 patterns and (c) HAADF-STEM image of the PtCo IMCs catalyst synthesized in grams scale.

79

80

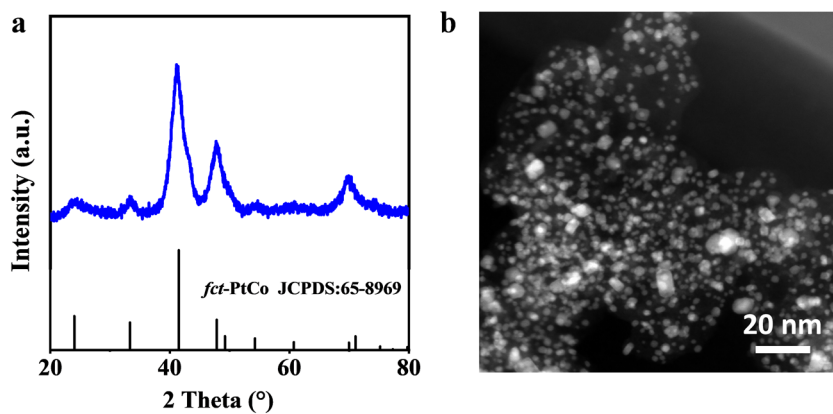

81

82 **Supplementary Figure 11.** (a) XRD patterns and (b) HAADF-STEM image of 45 wt% PtCo  
83 prepared with STG additives.

84

85

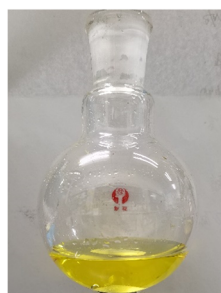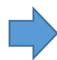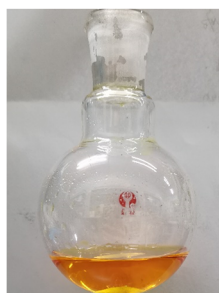

$\text{H}_2\text{PtCl}_6 \cdot 6\text{H}_2\text{O}$  (aq)

$\text{H}_2\text{PtCl}_6 \cdot 6\text{H}_2\text{O}$  (aq) + STG

86

87 **Supplementary Figure 12.** Photographs showing the discoloration of  $\text{H}_2\text{PtCl}_6 \cdot 6\text{H}_2\text{O}$  solution  
88 when adding STG.

89

90

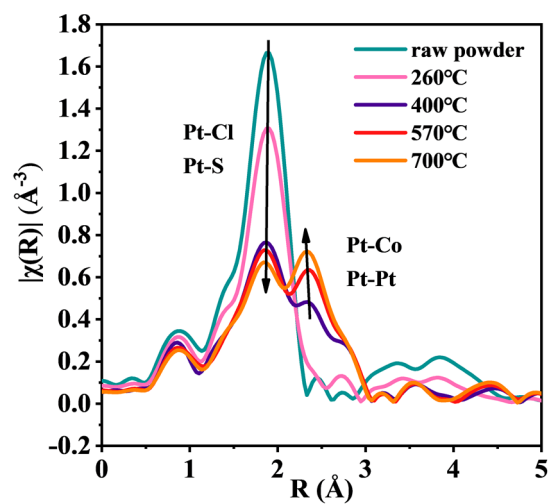

91

92 **Supplementary Figure 13.** R space of the XAFS results for the samples obtained after annealing  
 93 of STG-H<sub>2</sub>PtCl<sub>6</sub>-CoCl<sub>2</sub>/C precursor at different temperatures for 10 min.

94

95

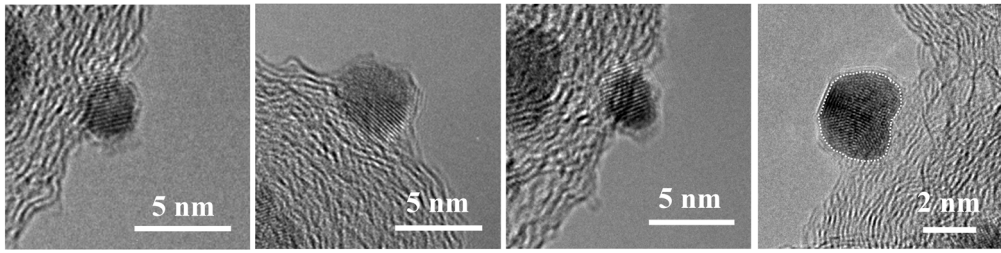

96

97 **Supplementary Figure 14.** High-resolution bright-field STEM images of the PtCo IMCs catalyst  
98 prepared with STG additives, showing the formation of thin carbon coating around PtCo particle.

99

100



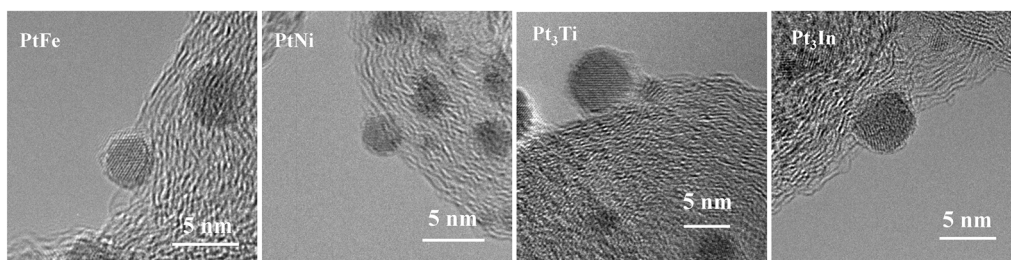

101

102 **Supplementary Figure 15.** High-resolution bright-field STEM images of PtFe, PtNi, Pt<sub>3</sub>Ti, and  
103 Pt<sub>3</sub>In IMCs catalyst prepared with STG additives.

104

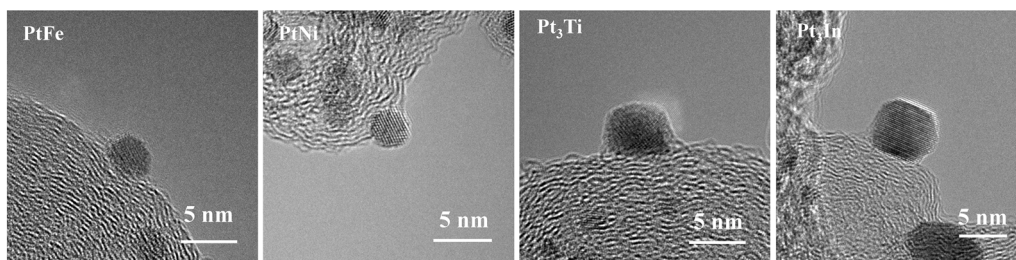

105  
106 **Supplementary Figure 16.** High-resolution bright-field STEM images of STG-assisted PtFe,  
107 PtNi, Pt<sub>3</sub>Ti, and Pt<sub>3</sub>In IMCs catalyst after air oxidation.  
108

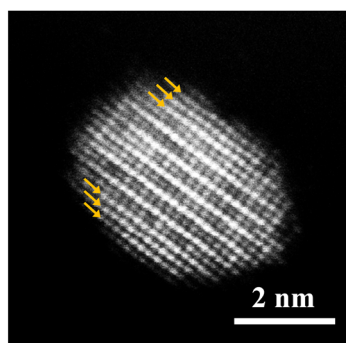

109

110 **Supplementary Figure 17.** Atomic-resolution HAADF-STEM image of the post-treated PtCo  
111 IMCs catalyst that was composed of an intermetallic PtCo core and two to three atomic layers of  
112 Pt shell.

113

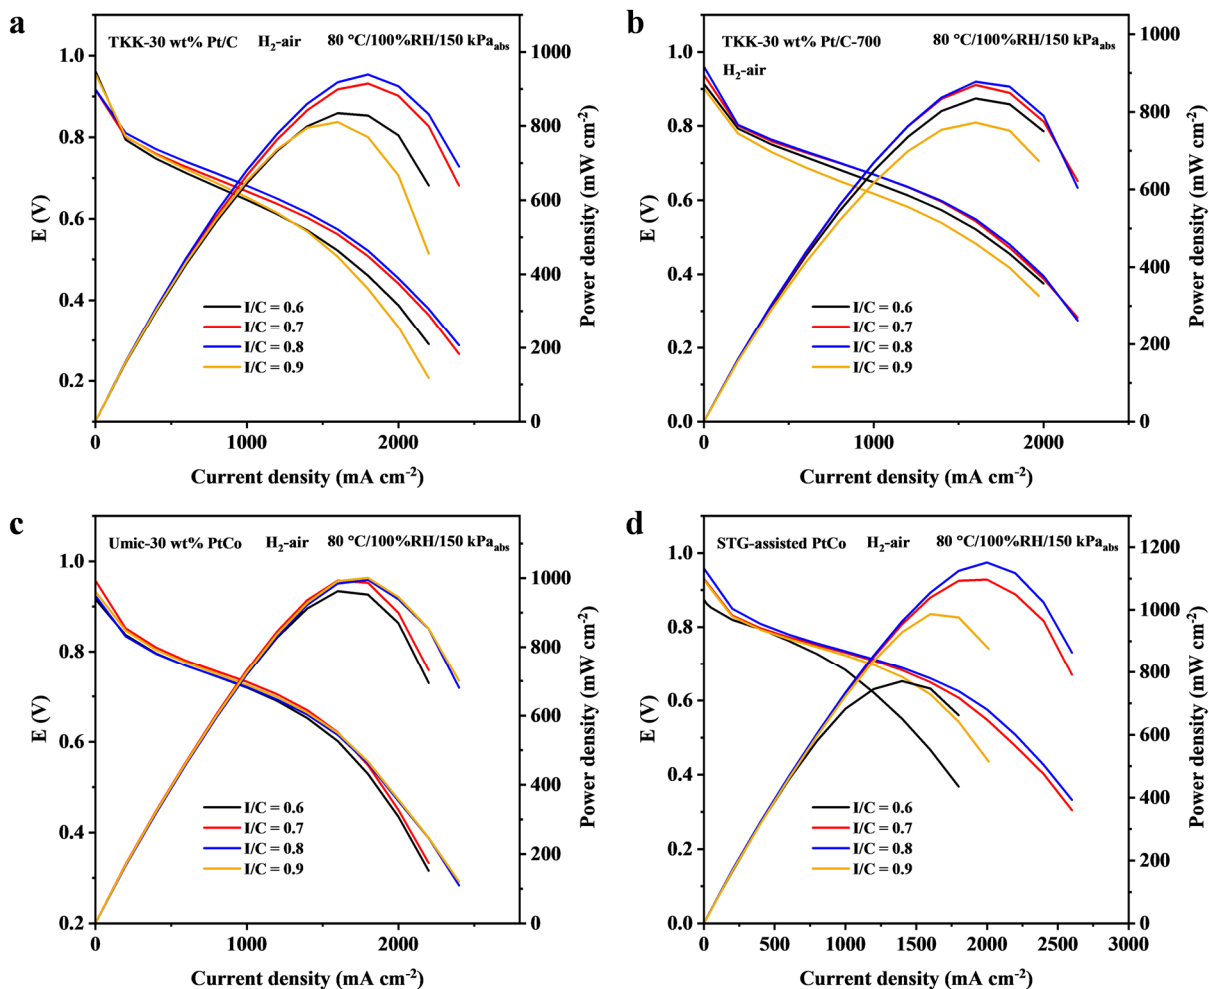

114

115 **Supplementary Figure 18.** The I/C ratio optimization process of TKK-30 wt% Pt/C (a), TKK-  
 116 30 wt% Pt/C-700 (b), Umic-30 wt% PtCo (c), and STG-assisted PtCo (d) catalysts. The I/C ratio  
 117 ranged from 0.6 to 0.9, and the MEAs made with catalysts of TKK-30 wt% Pt/C, TKK-30 wt%  
 118 Pt/C-700, and STG-assisted PtCo exhibited the optimal performance with the I/C ratio of 0.8,  
 119 while the Umic-30 wt% PtCo exhibited the optimal performance when the I/C is 0.9.

120

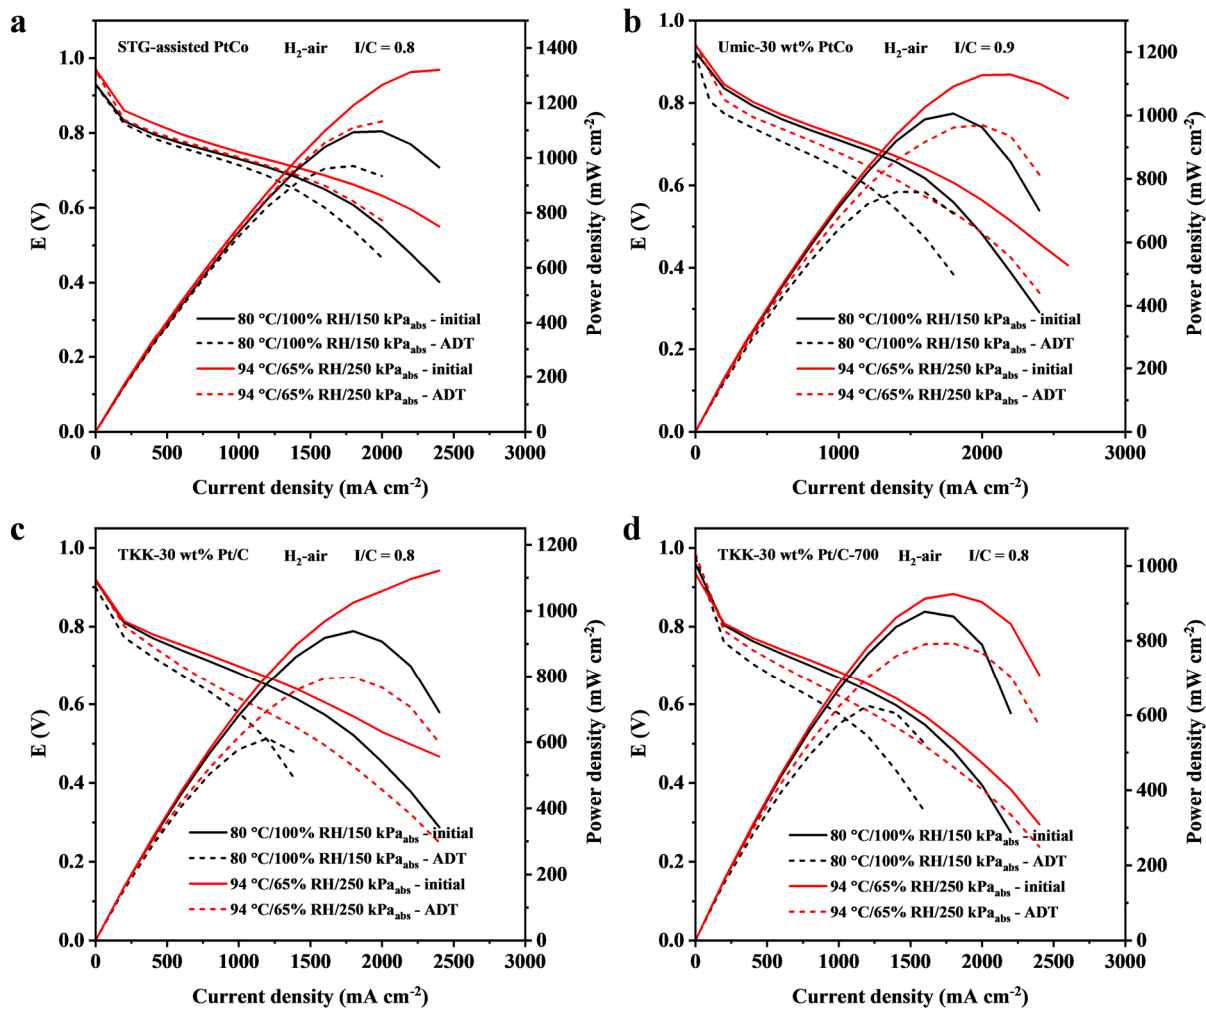

121

122 **Supplementary Figure 19.** H<sub>2</sub>-air polarization curves and power density plots of STG-assisted  
 123 PtCo (a), Umic-30 wt% PtCo (b), TKK-30 wt% Pt/C (c), and TKK-30 wt% Pt/C-700 (d) at the  
 124 beginning and after 30,000 cycles' ADT in the single-cell tests. All the catalysts used the optimal  
 125 I/C ratio. Test conditions: 80 °C, 100% RH, 150 kPa<sub>abs</sub>, or 94 °C, 65% RH, 250 kPa<sub>abs</sub>.

126

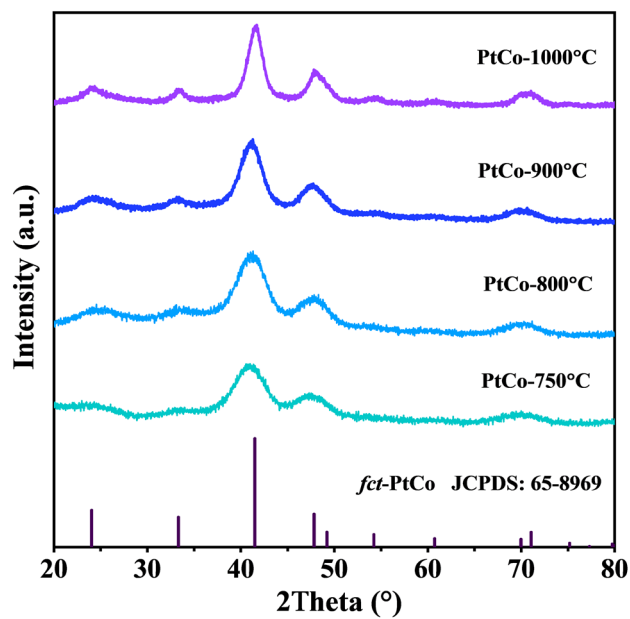

127

128 **Supplementary Figure 20.** XRD patterns of the PtCo catalysts prepared with STG additive at  
129 different temperatures, showing the gradually increased average particle size and ordering degree  
130 with temperature.

131

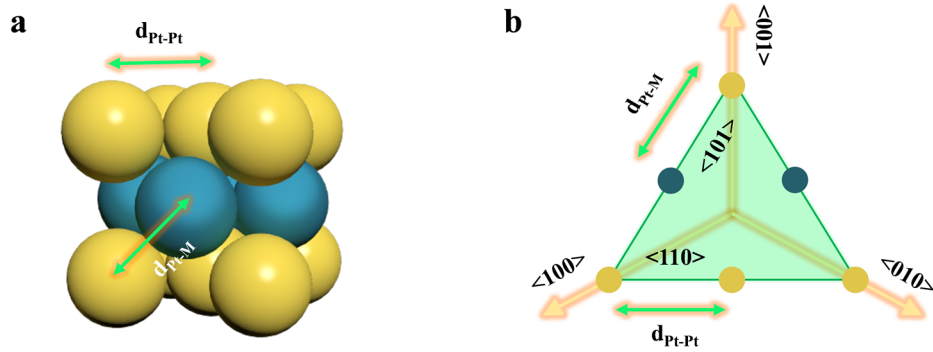

132

133 **Supplementary Figure 21.** (a) Crystal structure of *fcc*-PtM, yellow balls represent Pt, blue balls  
 134 correspond M (M is Mn, Fe, Co, Ni, or Zn). (b) Schematic illustration of lattice mismatch of (111)  
 135 facet, yellow circles represent Pt and blue circles represent M.

136

137

138

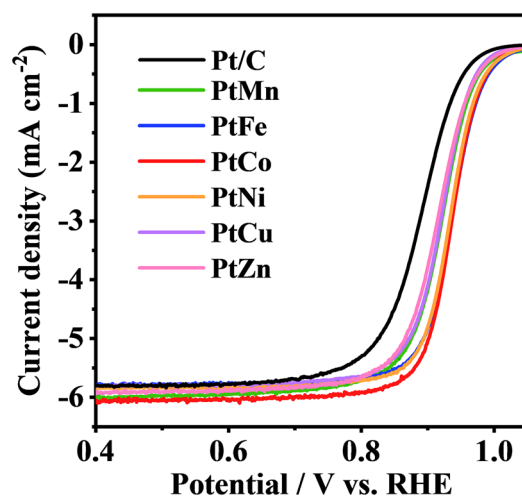

139

140 **Supplementary Figure 22.** RDE polarization curves of the five L1<sub>0</sub> PtM IMCs, the L1<sub>1</sub> PtCu  
141 IMCs, and the commercial TKK-30 wt% Pt/C.

142

143

144



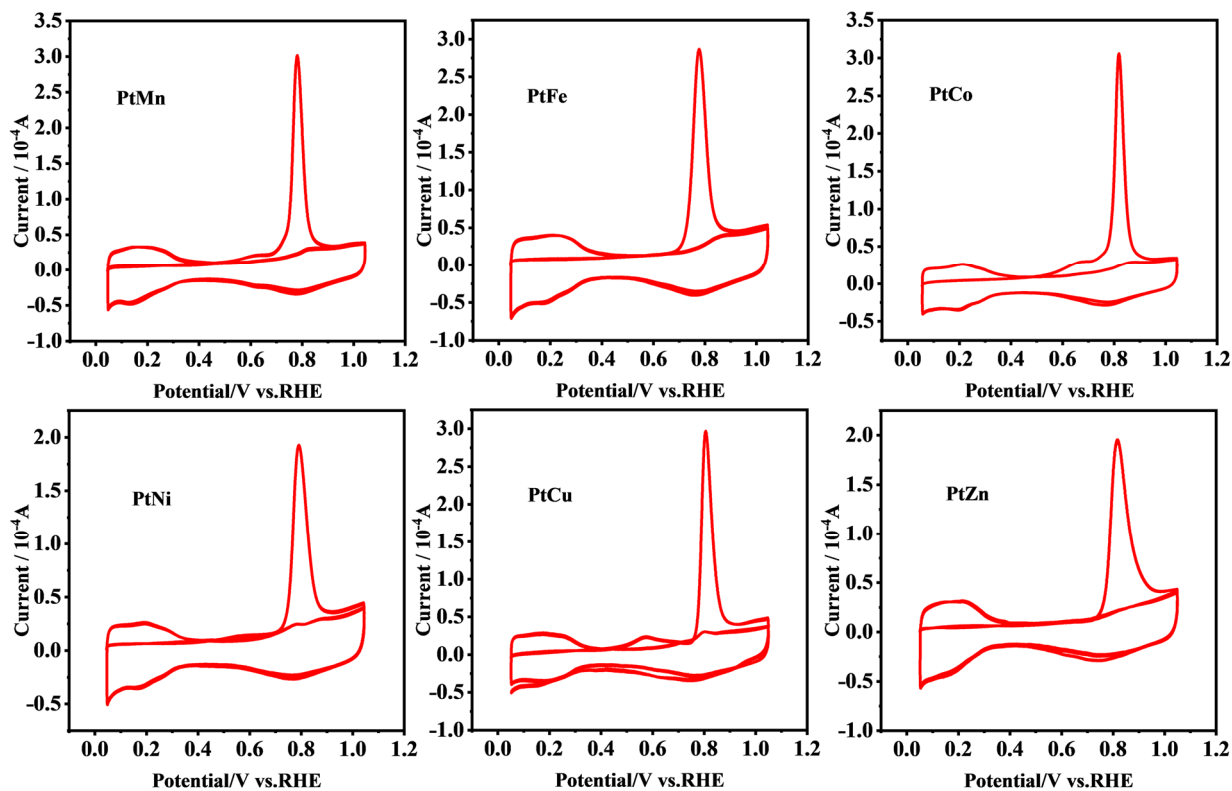

145

146 **Supplementary Figure 23.** CO-stripping curves of the IMCs catalysts for the ECSA  
 147 measurements. The corresponding values of ECSA were listed in Supplementary Table 6.

148

149

150 **Supplementary Table 1.** Average particle sizes of the PtCo samples prepared with different  
151 molecule additives at 700 °C.

| Sample             | XRD size (nm) | STEM size (nm) |
|--------------------|---------------|----------------|
| PtCo-Additive free | 14.9          | 12.9           |
| PtCo-BZF           | 12.4          | 9.5            |
| PtCo-GLU           | 9.6           | 8.8            |
| PtCo-SAc           | 8.3           | 7.7            |
| PtCo-APR           | 6.4           | 5.7            |
| PtCo-SGC           | 4.8           | 5.5            |
| PtCo-DCDA          | 5.5           | 5.4            |
| PtCo-MUA           | 4.3           | 3.4            |
| PtCo-MBM           | 3.5           | 3.0            |
| PtCo-MPA           | 2.4           | 2.3            |
| PtCo-STG           | 2.8           | 2.5            |

152

153

154 **Supplementary Table 2.** Average particle sizes of the 18 Pt-IMCs catalysts prepared with and  
 155 without STG additive from XRD results. The optimal annealing procedure and ordering degree  
 156 of the Pt-IMCs prepared with STG additive were also listed.

| Sample             | XRD size (nm) |          | Optimal annealing procedure | Ordering degree (%) |
|--------------------|---------------|----------|-----------------------------|---------------------|
|                    | With STG      | STG-free |                             |                     |
| Pt <sub>3</sub> Al | 4.9           | 9.7      | 900/2h                      | 27 <sup>a</sup>     |
| Pt <sub>3</sub> Ti | 4.3           | 8.8      | 900/2h-600/6h               | 35 <sup>a</sup>     |
| Pt <sub>3</sub> V  | 5.4           | 10.4     | 1000/2h-600/6h              | 35 <sup>a</sup>     |
| Pt <sub>3</sub> Cr | 4.3           | 8.7      | 900/2h-600/6h               | 82 <sup>a</sup>     |
| Pt <sub>3</sub> Mn | 4.1           | 8.3      | 800/2h-600/6h               | 75 <sup>a</sup>     |
| PtMn               | 4.5           | 10.0     | 900/2h-600/6h               | 49 <sup>b</sup>     |
| Pt <sub>3</sub> Fe | 4.8           | 8.5      | 900/2h-600/6h               | 73 <sup>a</sup>     |
| PtFe               | 3.5           | 8.9      | 900/2h-700/6h               | 76 <sup>c</sup>     |
| Pt <sub>3</sub> Co | 5.2           | 8.2      | 900/2h-600/6h               | 82 <sup>a</sup>     |
| PtCo               | 3.3           | 9.2      | 900/2h-600/6h               | 72 <sup>c</sup>     |
| PtNi               | 3.4           | 8.6      | 900/2h-550/6h               | 53 <sup>c</sup>     |
| PtCu               | 3.0           | 8.7      | 800/2h-600/6h               | —                   |
| PtCu <sub>3</sub>  | 3.5           | 12.2     | 900/2h-600/6h               | 34 <sup>d</sup>     |
| PtZn               | 4.7           | 9.5      | 900/2h-600/6h               | 51 <sup>b</sup>     |
| Pt <sub>3</sub> Ga | 5.4           | 11.1     | 900/2h                      | 77 <sup>a</sup>     |
| Pt <sub>3</sub> Ge | 5.6           | 11.3     | 900/2h                      | —                   |
| Pt <sub>3</sub> In | 4.2           | 11.5     | 900/2h                      | 96 <sup>a</sup>     |
| Pt <sub>3</sub> Sn | 4.7           | 8.3      | 900/2h                      | 94 <sup>a</sup>     |

157 <sup>a</sup>S<sub>(110)</sub>/S<sub>(111)</sub>

158 <sup>b</sup>S<sub>(110)</sub>/[S<sub>(111)</sub>+S<sub>(200)</sub>]

159 <sup>c</sup>S<sub>(110)</sub>/[S<sub>(111)</sub>+S<sub>(200)</sub>+S<sub>(002)</sub>]

160 <sup>d</sup>I<sub>(110)</sub>/I<sub>(111)</sub>

161

162

163

164

165 **Supplementary Table 3.** Type and dosage of Pt and non-Pt precursors used for the synthesis of  
 166 Pt-IMCs libraries.

| Sample             | Pt precursor                                        |               | Non-Pt precursor                                     |               |
|--------------------|-----------------------------------------------------|---------------|------------------------------------------------------|---------------|
|                    | Type                                                | Dosage (mmol) | Type                                                 | Dosage (mmol) |
| Pt <sub>3</sub> Al |                                                     | 0.13          | AlCl <sub>3</sub> ·6H <sub>2</sub> O                 | 0.052         |
| Pt <sub>3</sub> Ti |                                                     | 0.203         | TiCl <sub>4</sub>                                    | 0.068         |
| Pt <sub>3</sub> V  |                                                     | 0.202         | VCl <sub>3</sub>                                     | 0.067         |
| Pt <sub>3</sub> Cr |                                                     | 0.202         | CrCl <sub>3</sub> ·6H <sub>2</sub> O                 | 0.067         |
| Pt <sub>3</sub> Mn |                                                     | 0.131         | MnCl <sub>2</sub> ·4H <sub>2</sub> O                 | 0.052         |
| PtMn               |                                                     | 0.171         | MnCl <sub>2</sub> ·4H <sub>2</sub> O                 | 0.206         |
| Pt <sub>3</sub> Fe |                                                     | 0.2           | FeCl <sub>3</sub>                                    | 0.067         |
| PtFe               |                                                     | 0.171         | FeCl <sub>3</sub>                                    | 0.205         |
| Pt <sub>3</sub> Co | H <sub>2</sub> PtCl <sub>6</sub> ·6H <sub>2</sub> O | 0.2           | CoCl <sub>2</sub> ·6H <sub>2</sub> O                 | 0.067         |
| PtCo               |                                                     | 0.168         | CoCl <sub>2</sub> ·6H <sub>2</sub> O                 | 0.252         |
| PtNi               |                                                     | 0.169         | NiCl <sub>2</sub> ·6H <sub>2</sub> O                 | 0.203         |
| PtCu               |                                                     | 0.166         | Cu(NO <sub>3</sub> ) <sub>2</sub> ·3H <sub>2</sub> O | 0.182         |
| PtCu <sub>3</sub>  |                                                     | 0.111         | Cu(NO <sub>3</sub> ) <sub>2</sub> ·3H <sub>2</sub> O | 0.4           |
| PtZn               |                                                     | 0.165         | Zn(NO <sub>3</sub> ) <sub>2</sub> ·6H <sub>2</sub> O | 0.197         |
| Pt <sub>3</sub> Ga |                                                     | 0.132         | GaCl <sub>3</sub>                                    | 0.053         |
| Pt <sub>3</sub> Ge |                                                     | 0.132         | GeCl <sub>4</sub>                                    | 0.053         |
| Pt <sub>3</sub> In |                                                     | 0.135         | InCl <sub>3</sub>                                    | 0.054         |
| Pt <sub>3</sub> Sn |                                                     | 0.135         | SnCl <sub>2</sub> ·2H <sub>2</sub> O                 | 0.054         |

167

168

169

170 **Supplementary Table 4.** The atomic ratio results obtained by EDS mapping of Supplementary  
171 Figures 4-8.

| Sample             | Atomic ratio (%) |      |      |
|--------------------|------------------|------|------|
|                    | Pt               | M    | S    |
| PtFe               | 47.4             | 42.5 | 10.1 |
| PtCo               | 47.5             | 45.2 | 7.3  |
| PtNi               | 47.2             | 44.1 | 8.7  |
| Pt <sub>3</sub> Co | 71.8             | 23.7 | 4.5  |
| PtCu               | 54.8             | 45.2 | --   |

172

173

174 **Supplementary Table 5.** Average particle sizes from XRD and the ordering degree of additional  
175 PtCo IMCs catalysts prepared with STG additives, including the ones prepared at different  
176 temperatures, the one synthesized in grams scale, and the one with a high metal loading of 45  
177 wt%.

| Sample           | XRD size (nm) | Ordering degree (%) |
|------------------|---------------|---------------------|
| PtCo-750°C       | 2.3           | 53                  |
| PtCo-800°C       | 2.5           | 63                  |
| PtCo-900°C       | 3.6           | 72                  |
| PtCo-1000°C      | 4.5           | 79                  |
| Large-scale PtCo | 4.3           | 65                  |
| 45 wt% PtCo      | 4.7           | 56                  |

178

179

180 **Supplementary Table 6.** ECSA, mass activity, and specific activity of the commercial TKK-30  
181 wt% Pt/C and the STG-assisted PtM IMCs catalysts. The mass activity and specific activity were  
182 obtained at 0.9 V vs RHE, and the electrochemical tests were measured in thin film-RDE (10  $\mu$ g  
183 catalyst on 0.196 cm<sup>2</sup> disk).

| Sample | ECSA (m <sup>2</sup> g <sub>Pt</sub> <sup>-1</sup> ) | Mass activity<br>(A mg <sub>Pt</sub> <sup>-1</sup> ) | Specific activity<br>(mA cm <sup>-2</sup> ) |
|--------|------------------------------------------------------|------------------------------------------------------|---------------------------------------------|
| Pt/C   | 72.5                                                 | 0.35                                                 | 0.48                                        |
| PtMn   | 75.1                                                 | 1.12                                                 | 1.49                                        |
| PtFe   | 86.7                                                 | 2.18                                                 | 2.51                                        |
| PtCo   | 70.1                                                 | 2.25                                                 | 3.21                                        |
| PtNi   | 63.4                                                 | 2.11                                                 | 3.33                                        |
| PtCu   | 74.8                                                 | 1.18                                                 | 1.57                                        |
| PtZn   | 78.8                                                 | 0.88                                                 | 1.12                                        |

184

185

186 **Supplementary Table 7.** Calculated surface strain of the five L1<sub>0</sub> PtM IMCs catalysts. Negative  
187 values indicate compression strain.

| Sample | Surface strain (%) |
|--------|--------------------|
| PtMn   | -1.83%             |
| PtFe   | -3.84%             |
| PtCo   | -8.24%             |
| PtNi   | -8.97%             |
| PtZn   | -2.74%             |

188



189 **Supplementary Table 8.** A detailed comparison of MEA performance of STG-assisted PtCo, Umic-30 wt% PtCo, TKK-30 wt% Pt/C, and TKK-  
 190 30 wt% Pt/C-700 in H<sub>2</sub>-air single-cell test.

| Sample                  | Current density<br>(mA cm <sup>-2</sup> )<br>80 °C/100%RH/150<br>kPa <sub>abs</sub> |          | Power density<br>(W cm <sup>-2</sup> )<br>80 °C/100%RH/150<br>kPa <sub>abs</sub> |          | Mass activity at 0.9 V<br>(A mg <sub>Pt</sub> <sup>-1</sup> ) |           |                                                                        | Voltage loss at 0.8 A<br>cm <sup>-2</sup><br>(mV) |                                                     | Rated power density<br>(W cm <sup>-2</sup> )<br>94 °C/65%RH/250<br>kPa <sub>abs</sub> |      |
|-------------------------|-------------------------------------------------------------------------------------|----------|----------------------------------------------------------------------------------|----------|---------------------------------------------------------------|-----------|------------------------------------------------------------------------|---------------------------------------------------|-----------------------------------------------------|---------------------------------------------------------------------------------------|------|
|                         | at 0.8 V                                                                            | at 0.6 V | at 0.8 V                                                                         | at 0.6 V | initial                                                       | After ADT | DOE 2025<br>target                                                     |                                                   |                                                     | initial                                                                               | ADT  |
| TKK-30 wt% Pt/C         | 250                                                                                 | 1470     | 0.20                                                                             | 0.88     | 0.32                                                          | 0.15      | ≥ 0.44 A mg <sub>Pt</sub> <sup>-1</sup><br><br>≤ 40% loss<br>after ADT | 83                                                | DOE 2025<br>target: ≤<br>30 mV<br>loss after<br>ADT | 0.79                                                                                  | 0.49 |
| TKK-30 wt% Pt/C<br>-700 | 216                                                                                 | 1390     | 0.17                                                                             | 0.83     | 0.28                                                          | 0.19      |                                                                        | 81                                                |                                                     | 0.73                                                                                  | 0.51 |
| Umic-30 wt%<br>PtCo     | 395                                                                                 | 1659     | 0.32                                                                             | 0.99     | 0.86                                                          | 0.58      |                                                                        | 76                                                |                                                     | 0.94                                                                                  | 0.71 |
| STG-assisted PtCo       | 412                                                                                 | 1821     | 0.33                                                                             | 1.09     | 1.08                                                          | 0.81      |                                                                        | 21                                                |                                                     | 1.17                                                                                  | 1.03 |

191
